# Supplementary material for: Rare genetic associations with human lifespan in UK Biobank are enriched for oncogenic genes
Source: Springer Nature journal article supplement (doi:10.1038/s41467-025-57315-6), 2025-02-28
Supplement: MOESM1 [file 41467_2025_57315_MOESM1_ESM.pdf]

# **Rare genetic associations with human lifespan in UK Biobank are enriched for oncogenic genes**

Junyoung Park<sup>1\*</sup>, Andrés Peña-Tauber<sup>1</sup>, Lia Talozzi<sup>1</sup>, Michael D. Greicius<sup>1†</sup>, Yann Le Guen<sup>2†</sup>

## **Affiliations**

<sup>1</sup>Department of Neurology and Neurological Sciences, Stanford University, Stanford, CA, 94305, USA.

<sup>2</sup>Quantitative Sciences Unit, Department of Medicine, Stanford University, Stanford, CA, 94304, USA.

## **Corresponding authors:**

Junyoung Park  
Stanford Neuroscience Health Center  
290 Jane Stanford Way,  
Stanford, CA 94305-5090  
[jpark01@stanford.edu](mailto:jpark01@stanford.edu)  
(650) 666-2696

**†These authors contributed equally**

**Supplementary Figure 1. Phenome-wide association of rs13190937 on *ZSCAN23*.** This analysis is based on PheWeb (<https://pheweb.org/UKB-Neale/>).

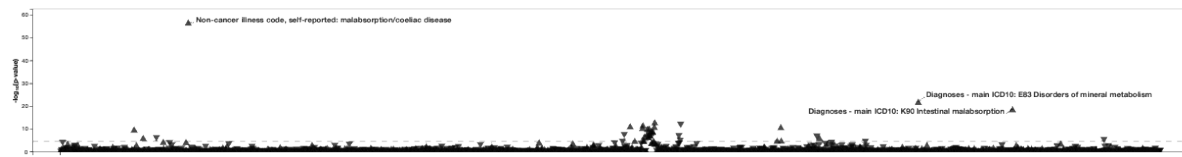

**Supplementary Figure 2. Sex-stratified common variant GWAS of lifespan.** Manhattan plot in males (A), and females (B). (C) Phenome-wide association of rs577106756 located in *PRKD3*. This analysis is based on PheWeb (<https://pheweb.org/UKB-Neale/>). Locuszoom (D) and colocalization (E) plots at the *MUC5B* locus in males, colocalized with *MUC5B* eQTL in lung tissue in GTEx. PP4: posterior probability of colocalization. (F) and (G) Phenome-wide association of rs35705950 near *MUC5B* and rs547541271 in *CELF2*, respectively, based on PheWeb (<https://pheweb.org/UKB-Neale/>).

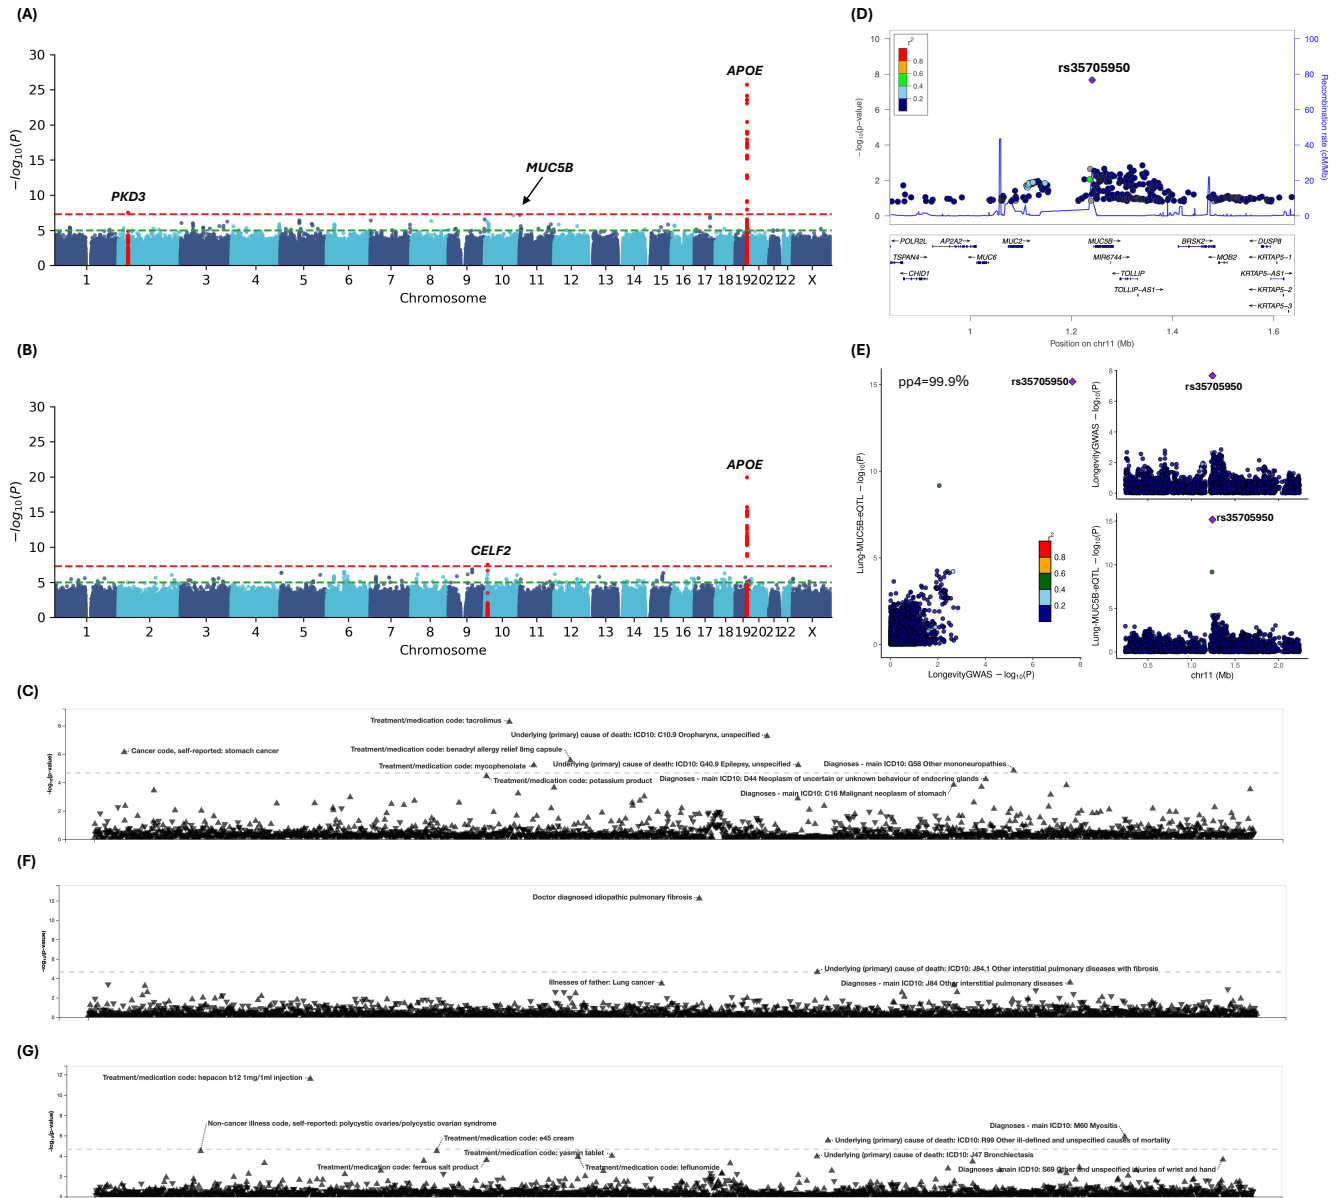

**Supplementary Figure 3. Rare variant SKAT-O association with lifespan considering 3 categories: Loss-of-function (A), AlphaMissense (B), and REVEL (C). Genes highlighted in red represent those not previously identified as significant in [8]. A gene-wide significance threshold of  $p=7.4 \times 10^{-7}$  was applied.**

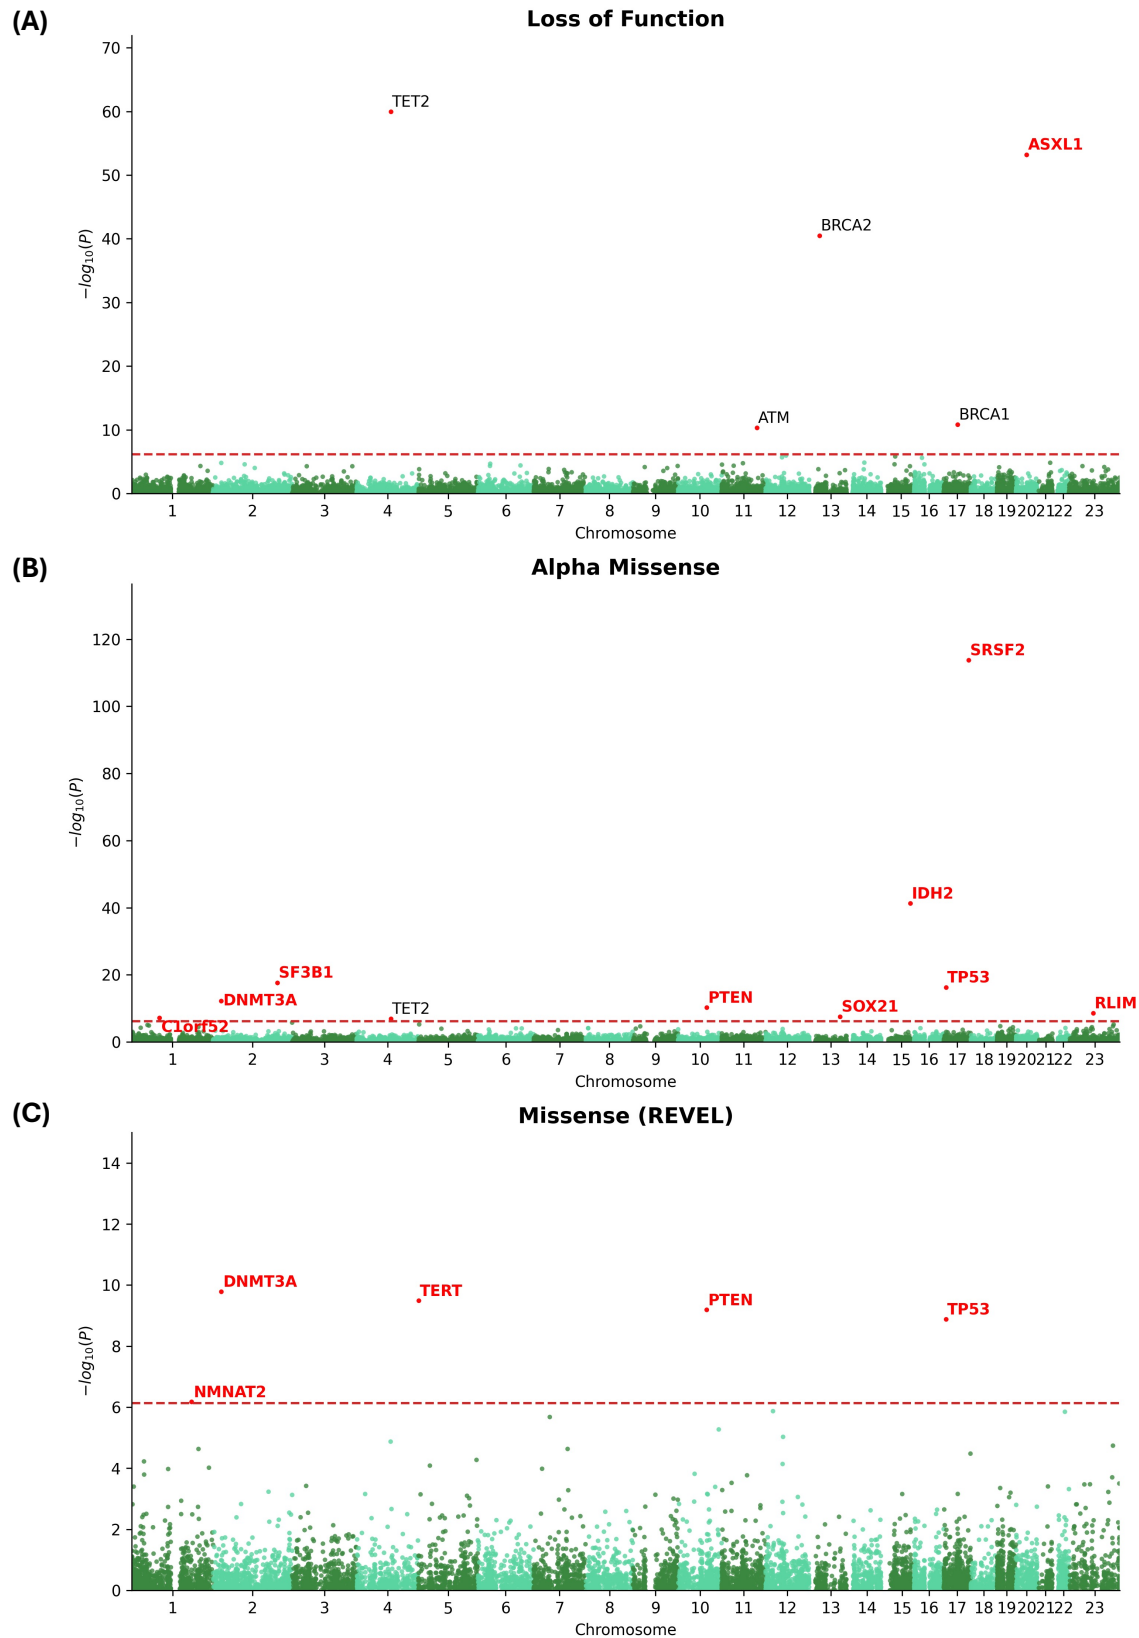



**Supplementary Figure 4. Rare variant burden association with lifespan considering REVEL pathogenic missense variants.** Genes highlighted in red represent those not previously identified as significant in [8]. A gene-wide significance threshold of  $p=7.4 \times 10^{-7}$  was applied.

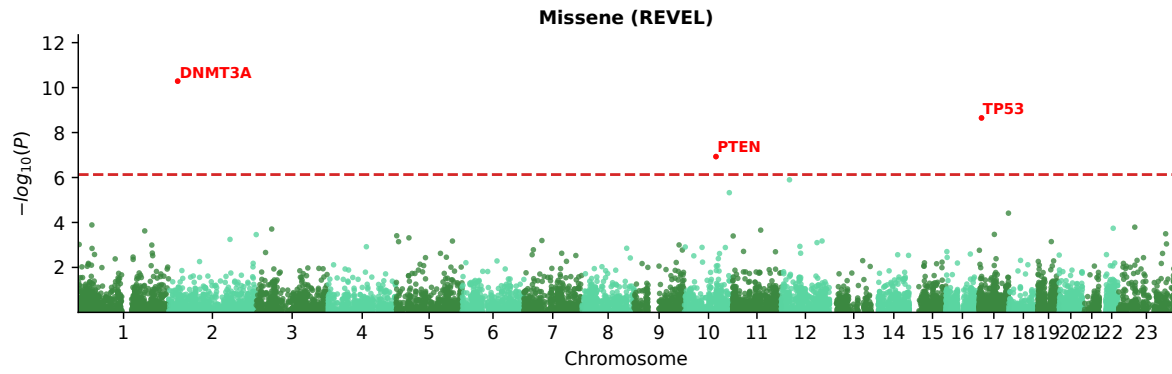

**Supplementary Figure 5. Sex-stratified rare variant burden association with lifespan considering 3 categories for each sex: Loss-of-function (A), AlphaMissense (B), and REVEL (C). Genes highlighted in red represent those that were not identified as significant in the whole cohort analysis. A gene-wide significance threshold of  $p=7.4 \times 10^{-7}$  was applied.**

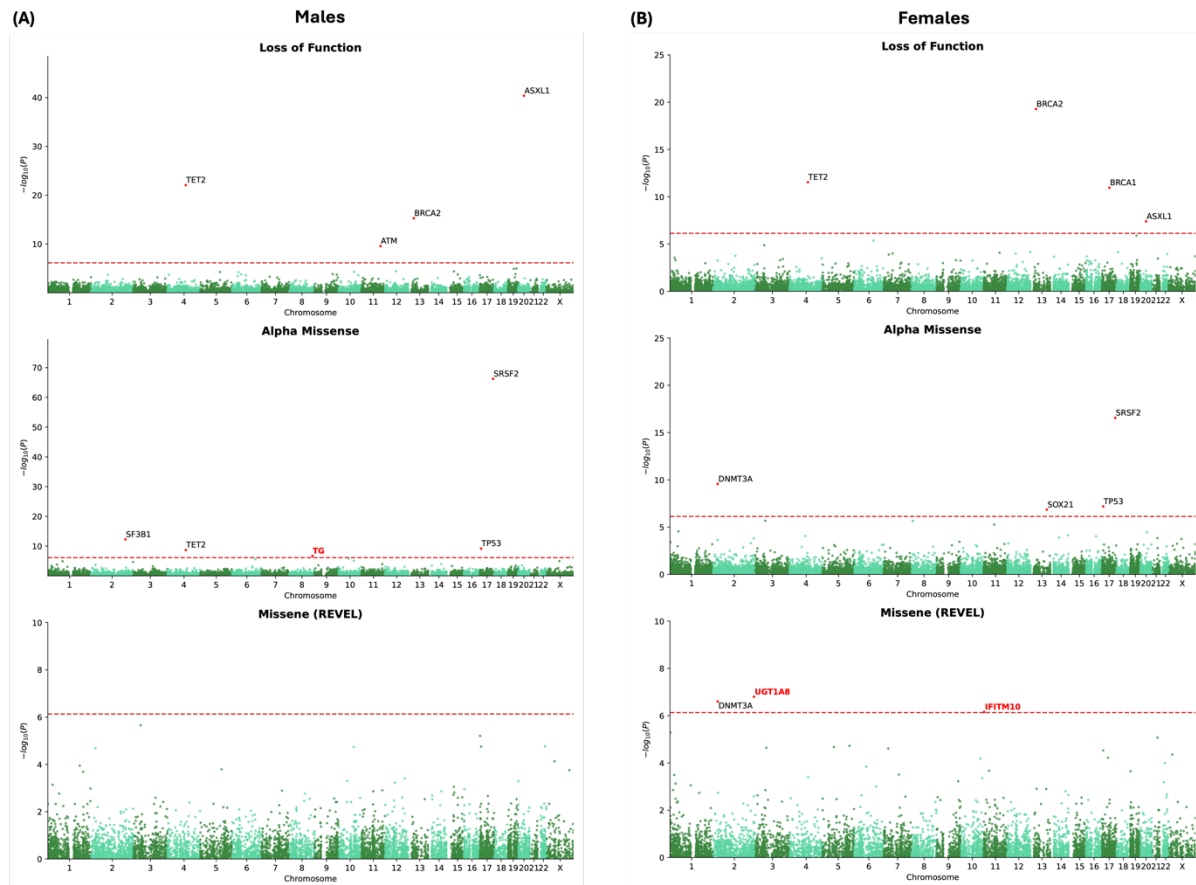

**Supplementary Figure 6. Sex-stratified rare variants SKAT-O association with lifespan considering 3 categories for each sex: Loss-of-function (A), AlphaMissense (B), and REVEL (C). Genes highlighted in red represent those that were not identified as significant in the whole cohort analysis. A gene-wide significance threshold of  $p=7.4 \times 10^{-7}$  was applied.**

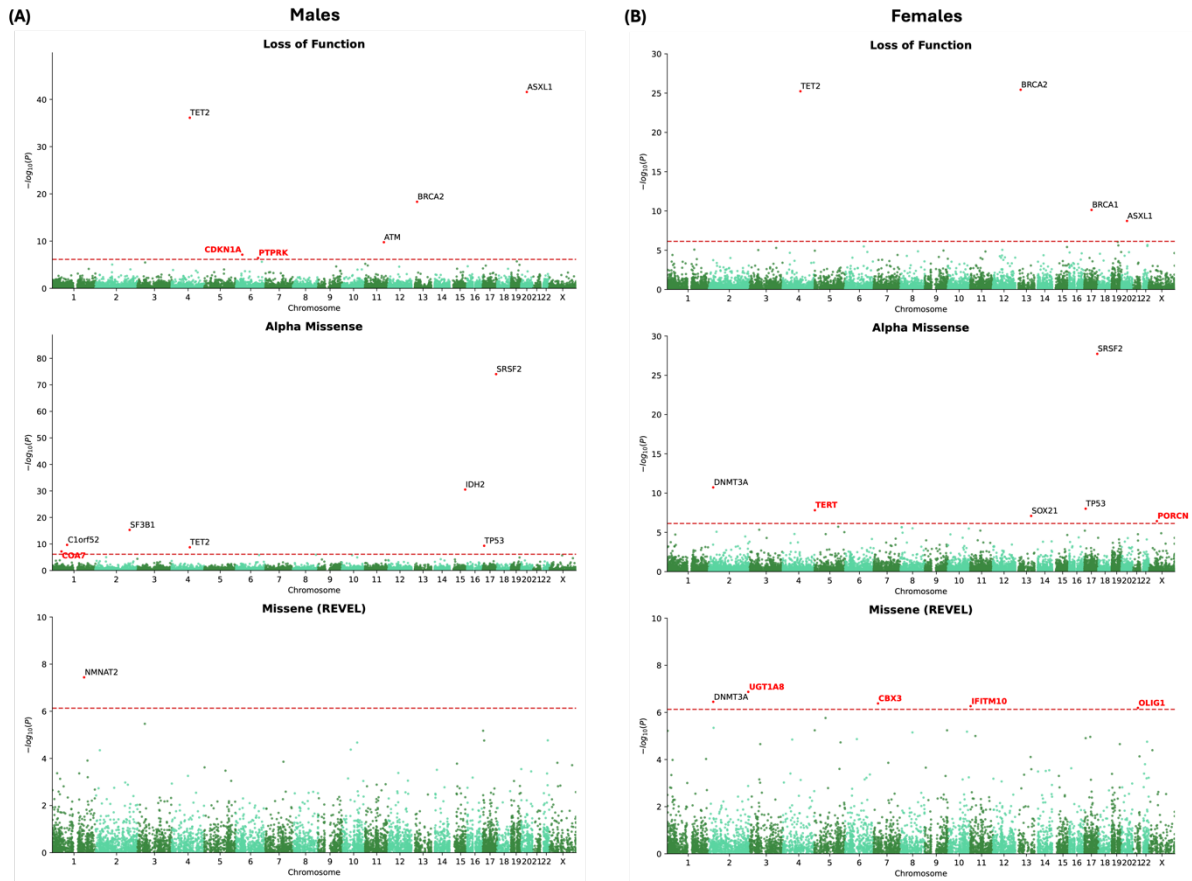

**Supplementary Figure 7. Survival curves comparing carriers and non-carriers of variants considered on genes with a significant burden of loss-of-function (*TET2*, *ATM*, *BRCA2* and *BRCA1*) (A), AlphaMissense pathogenic (B) variants (*TET2*), missense variants predicted by REVEL (*DNMT3A*, *PTEN* and *TP53*) (C).**

**(A) Loss of Function**

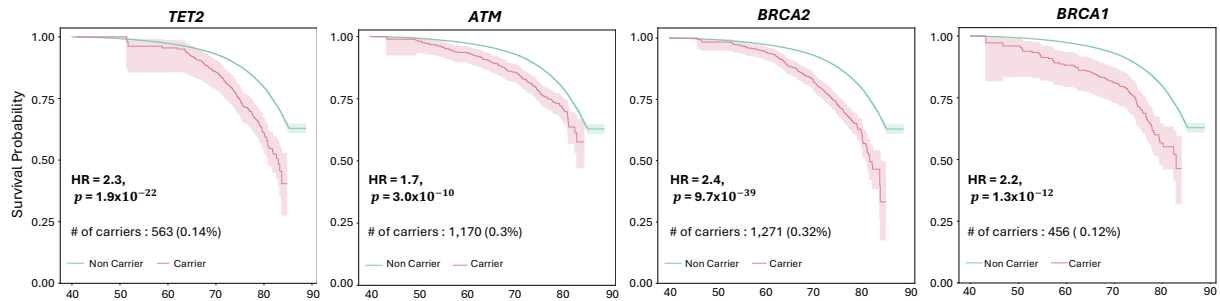

**(B) Alpha Missense**

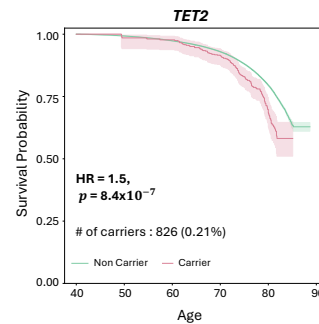

**(C) Missense (REVEL)**

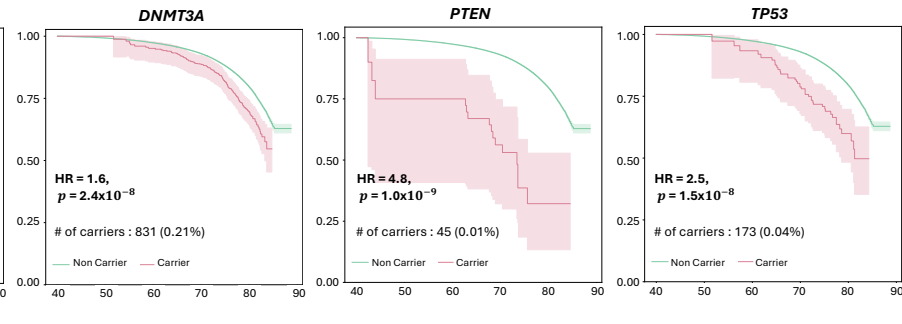

**Supplementary Figure 8. Phenome-wide association of the burden of rare variants at the nine novel genes identified in our burden test.** The variants include those classified as loss-of-function and those identified as AlphaMissense variants. P-values less than  $1.0 \times 10^{-50}$  are capped at 50.

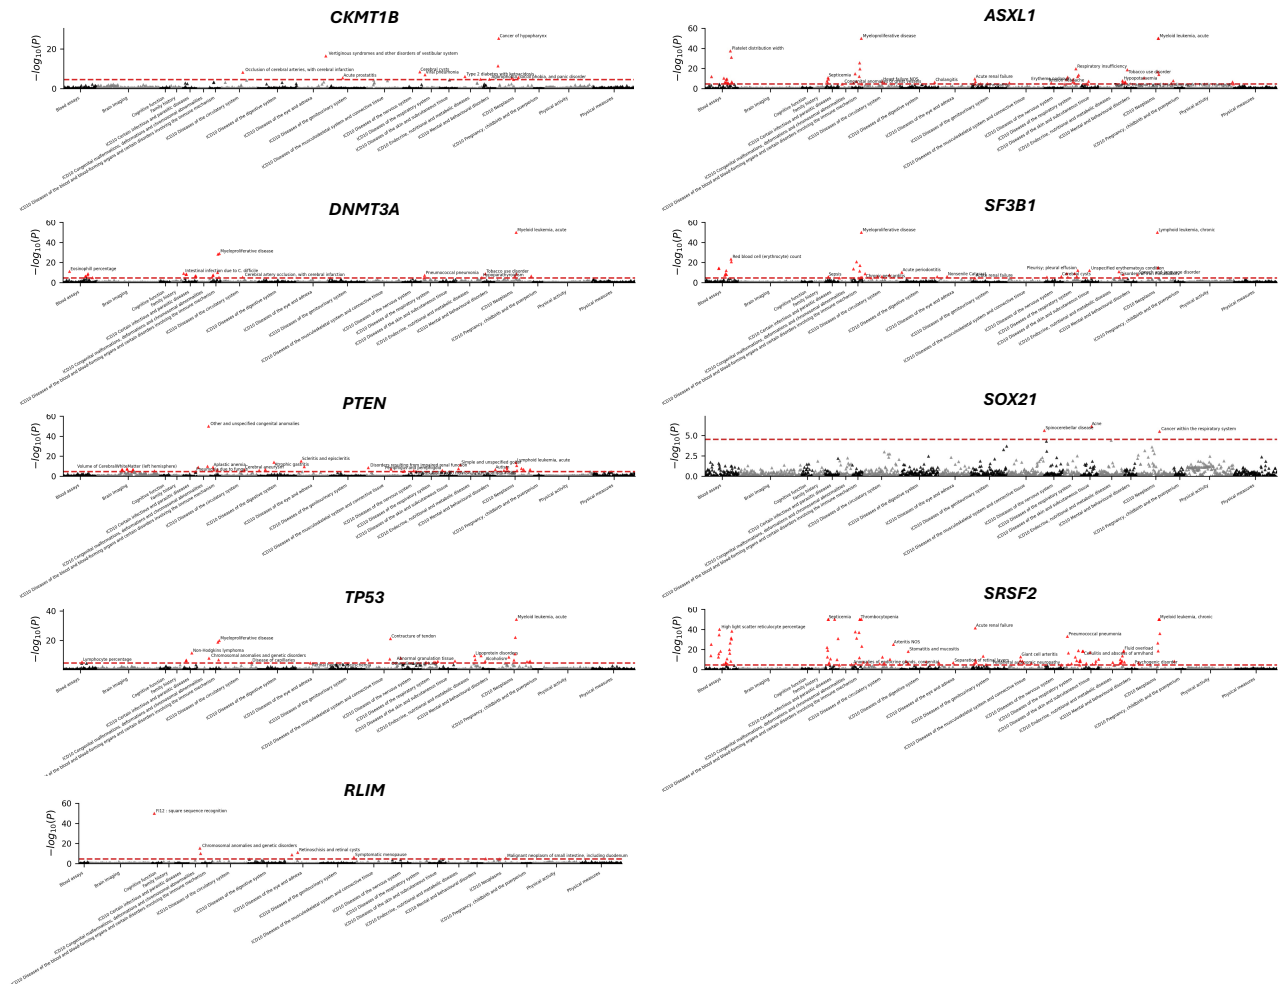

**Supplementary Figure 9. Variant allelic fraction distribution per gene for variants considered in each category: Loss-of-function (A) and AlphaMissense (B).**

**(A) Loss of Function**

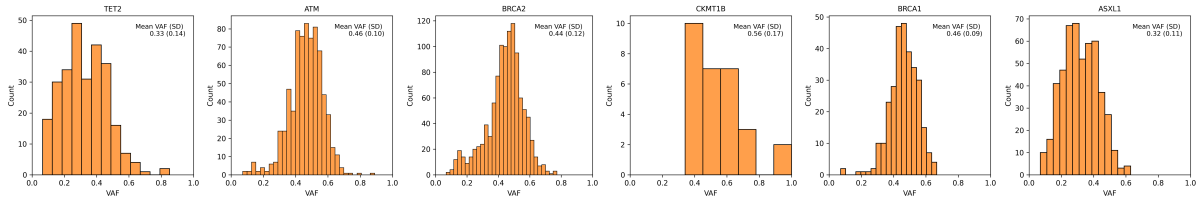

**(B) Alpha Missense**

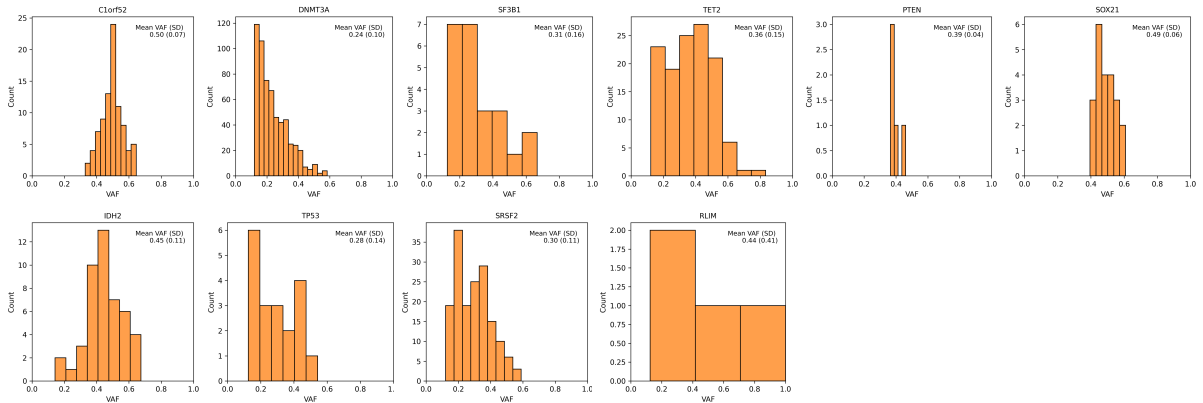

**Supplementary Table 1. Demographics of European ancestry in the analyses.**

|                        | All                |                    |                   | Male              |                   |                  | Female            |                   |                  |
|------------------------|--------------------|--------------------|-------------------|-------------------|-------------------|------------------|-------------------|-------------------|------------------|
|                        | Total              | Living             | Deceased          | Total             | Living            | Deceased         | Total             | Living            | Deceased         |
| N                      | 393,833            | 358,282            | 35,551            | 180,970           | 159,911           | 21,059           | 212,863           | 198,371           | 14,492           |
| Last known age         | 70.8<br>± 7.9      | 70.7<br>± 8.0      | 71.2<br>± 7.5     | 70.9<br>± 8.0     | 70.8<br>± 8.1     | 71.3<br>± 7.4    | 70.7<br>± 7.9     | 70.7<br>± 7.9     | 71.1<br>± 7.6    |
| <i>APOE</i> ε4 carrier | 113,437<br>(28.8%) | 102,360<br>(28.6%) | 11,077<br>(31.2%) | 52,190<br>(28.8%) | 45,635<br>(28.5%) | 6,555<br>(31.1%) | 61,247<br>(28.8%) | 56,725<br>(28.6%) | 4,522<br>(31.2%) |

**Supplementary Table 2. Validation of Significant SNPs in FinnGen and LifeGen + UKB Cohorts for human lifespan related phenotypes.**

| Cohort                                                                       | Phenotype             | SNP         | Effect allele | N       | Beta   | <i>p</i> -value      |
|------------------------------------------------------------------------------|-----------------------|-------------|---------------|---------|--------|----------------------|
| FinnGen<br>( <a href="https://r11.finnngen.fi">https://r11.finnngen.fi</a> ) | Death                 | rs13190937  | A             | 453,733 | -0.011 | 0.20                 |
|                                                                              |                       | rs577106756 | A             | 453,733 | -0.07  | 0.55                 |
|                                                                              |                       | rs35705950  | T             | 453,733 | 0.034  | $6.0 \times 10^{-3}$ |
|                                                                              |                       | rs547541271 | T             | 453,733 | -0.018 | 0.93                 |
| LifeGen + UKB <sup>2</sup>                                                   | Parental age at death | rs13190937  | A             | 640,183 | -0.015 | $1.4 \times 10^{-4}$ |
|                                                                              |                       | rs35705950  | T             | 583,397 | -0.023 | $6.6 \times 10^{-3}$ |



**Supplementary Table 3. Significant genes for burden and SKAT-O association of rare variants, considering missense variants with REVEL > 75 ( $p < 7.4 \times 10^{-7}$ ).** Gene names in bold font represent associations identified in REVEL without significance in the LoF or AlphaMissense.

| Variant Class | Chr | Gene          | # of variants | # of carriers | Burden<br><i>p</i> -value | SKAT-O<br><i>p</i> -value |
|---------------|-----|---------------|---------------|---------------|---------------------------|---------------------------|
| REVEL (>75)   | 1   | <b>NMNAT2</b> | 33            | 76            | $2.4 \times 10^{-4}$      | $6.7 \times 10^{-7}$      |
|               | 2   | <i>DNMT3A</i> | 116           | 831           | $5.2 \times 10^{-11}$     | $1.7 \times 10^{-10}$     |
|               | 5   | <b>TERT</b>   | 31            | 60            | $3.9 \times 10^{-4}$      | $3.3 \times 10^{-10}$     |
|               | 10  | <i>PTEN</i>   | 42            | 56            | $1.2 \times 10^{-7}$      | $6.5 \times 10^{-10}$     |
|               | 17  | <i>TP53</i>   | 47            | 173           | $2.2 \times 10^{-9}$      | $1.3 \times 10^{-9}$      |

**Supplementary Table 4. Gene-wide significance for rare variant burden analysis in the validation cohort.** This table shows the results of the gene-wide significance tests for the 21 novel genes identified in the discovery dataset, validated in a non-British ancestry sample from the UKB (n=73,281). Ancestry distribution in the validation cohort: White (66.3%), Asian (14.4%), Black (9.9%), Other (5.7%), and Mixed (3.7%). A significance threshold of  $p=1.1 \times 10^{-3}$  was applied after a Bonferroni correction for multiple testing. Genes that exceeded the Bonferroni correction threshold of  $1.1 \times 10^{-3}$  (0.05/42) are highlighted in bold font.

| Variant Class | Chr | Gene         | # of variants | # of carriers | Burden $p$ -value    | SKAT-O $p$ -value     |
|---------------|-----|--------------|---------------|---------------|----------------------|-----------------------|
| LoF           | 4   | <b>TET2</b>  | 67            | 151           | 0.02                 | $2.6 \times 10^{-4}$  |
|               | 11  | <b>ATM</b>   | 132           | 241           | $9.0 \times 10^{-4}$ | $2.4 \times 10^{-4}$  |
|               | 13  | <b>BRCA2</b> | 113           | 218           | $1.1 \times 10^{-3}$ | $1.8 \times 10^{-3}$  |
|               | 15  | CKMT1B       | 11            | 16            | 0.83                 | 1.0                   |
|               | 17  | <b>BRCA1</b> | 56            | 87            | $8.2 \times 10^{-3}$ | $9.2 \times 10^{-3}$  |
|               | 20  | <b>ASXL1</b> | 28            | 39            | $1.2 \times 10^{-5}$ | $6.7 \times 10^{-6}$  |
| AlphaMissense | 1   | Clorf52      | 14            | 18            | 0.07                 | 0.07                  |
|               | 2   | DNMT3A       | 59            | 123           | 0.85                 | 0.57                  |
|               | 2   | SF3B1        | 19            | 48            | 0.95                 | 0.62                  |
|               | 4   | TET2         | 50            | 82            | 0.33                 | 0.51                  |
|               | 10  | PTEN         | 10            | 33            | 0.79                 | 0.43                  |
|               | 13  | SOX21        | 21            | 33            | 0.74                 | 0.29                  |
|               | 15  | <b>IDH2</b>  | 45            | 65            | 0.73                 | $2.0 \times 10^{-7}$  |
|               | 17  | TP53         | 16            | 23            | 0.10                 | 0.06                  |
|               | 17  | <b>SRSF2</b> | 8             | 11            | $9.2 \times 10^{-9}$ | $2.2 \times 10^{-10}$ |
|               | X   | RLIM         | 8             | 25            | 0.19                 | 0.30                  |
| REVEL (>75)   | 1   | NMNAT2       | 13            | 25            | 0.73                 | 0.78                  |
|               | 2   | DNMT3A       | 52            | 99            | 0.57                 | 0.15                  |
|               | 5   | TERT         | 5             | 7             | 0.55                 | 0.74                  |
|               | 10  | PTEN         | 8             | 26            | 0.47                 | 0.66                  |
|               | 17  | TP53         | 28            | 37            | 0.94                 | 0.63                  |

LoF: Loss of Function; Chr: chromosome

**Supplementary Table 5. Significant genes for burden and SKAT-O association of rare variants in males ( $p < 7.4 \times 10^{-7}$ ).** Genes in bold font represent associations that were not significant in the analysis of the entire cohort but were significant only in males.

| Variant Class          | Chr      | Gene                 | # of variants | # of carriers | Burden<br><i>p</i> -value | SKAT-O<br><i>p</i> -value |
|------------------------|----------|----------------------|---------------|---------------|---------------------------|---------------------------|
| LoF                    | 4        | <i>TET2</i>          | 162           | 280           | $8.8 \times 10^{-23}$     | $7.7 \times 10^{-37}$     |
|                        | 6        | <b><i>CDKN1A</i></b> | 8             | 33            | $6.0 \times 10^{-5}$      | $7.5 \times 10^{-8}$      |
|                        | 6        | <b><i>PTPRK</i></b>  | 26            | 40            | $5.2 \times 10^{-3}$      | $3.7 \times 10^{-7}$      |
|                        | 11       | <i>ATM</i>           | 318           | 520           | $2.7 \times 10^{-10}$     | $1.7 \times 10^{-10}$     |
|                        | 13       | <i>BRCA2</i>         | 172           | 596           | $5.3 \times 10^{-16}$     | $4.7 \times 10^{-19}$     |
|                        | 20       | <i>ASXL1</i>         | 59            | 347           | $4.2 \times 10^{-41}$     | $2.7 \times 10^{-42}$     |
| AlphaMissense<br>(>70) | 1        | <i>Clorf52</i>       | 19            | 76            | $1.2 \times 10^{-5}$      | $2.2 \times 10^{-10}$     |
|                        | <b>1</b> | <b><i>COA7</i></b>   | 8             | 11            | $1.6 \times 10^{-4}$      | $6.7 \times 10^{-8}$      |
|                        | 2        | <i>SF3B1</i>         | 43            | 122           | $5.5 \times 10^{-13}$     | $5.0 \times 10^{-16}$     |
|                        | 4        | <i>TET2</i>          | 107           | 405           | $2.1 \times 10^{-9}$      | $1.8 \times 10^{-9}$      |
|                        | <b>8</b> | <b><i>TG</i></b>     | 113           | 657           | $2.0 \times 10^{-7}$      | $1.2 \times 10^{-6}$      |
|                        | 15       | <i>IDH2</i>          | 58            | 171           | $1.6 \times 10^{-3}$      | $2.9 \times 10^{-31}$     |
|                        | 17       | <i>TP53</i>          | 24            | 48            | $6.8 \times 10^{-10}$     | $4.8 \times 10^{-10}$     |
|                        | 17       | <i>SRSF2</i>         | 10            | 104           | $5.9 \times 10^{-67}$     | $9.0 \times 10^{-75}$     |
| REVEL (>75)            | 1        | <i>NMNAT2</i>        | 21            | 34            | $1.1 \times 10^{-4}$      | $3.6 \times 10^{-8}$      |

**Supplementary Table 6. Significant genes for burden and SKAT-O association of rare variants in females ( $p < 7.4 \times 10^{-7}$ ).** Genes in bold font represent associations that were not significant in the analysis of the entire cohort but were significant only in females.

| Variant Class          | Chr | Gene                  | # of variants | # of carriers | Burden<br><i>p</i> -value | SKAT-O<br><i>p</i> -value |
|------------------------|-----|-----------------------|---------------|---------------|---------------------------|---------------------------|
| LoF                    | 4   | <i>TET2</i>           | 151           | 283           | $2.9 \times 10^{-12}$     | $5.8 \times 10^{-26}$     |
|                        | 13  | <i>BRCA2</i>          | 182           | 675           | $5.3 \times 10^{-20}$     | $3.7 \times 10^{-26}$     |
|                        | 17  | <i>BRCA1</i>          | 80            | 217           | $1.1 \times 10^{-11}$     | $7.5 \times 10^{-11}$     |
|                        | 20  | <i>ASXL1</i>          | 46            | 186           | $4.0 \times 10^{-8}$      | $1.9 \times 10^{-9}$      |
| AlphaMissense<br>(>70) | 2   | <i>DNMT3A</i>         | 135           | 671           | $2.7 \times 10^{-10}$     | $1.9 \times 10^{-11}$     |
|                        | 5   | <i>TERT</i>           | 22            | 27            | $1.6 \times 10^{-3}$      | $1.5 \times 10^{-8}$      |
|                        | 13  | <i>SOX21</i>          | 34            | 251           | $1.4 \times 10^{-7}$      | $8.1 \times 10^{-8}$      |
|                        | 17  | <i>SRSF2</i>          | 10            | 37            | $2.8 \times 10^{-17}$     | $1.9 \times 10^{-28}$     |
|                        | 17  | <i>TP53</i>           | 23            | 52            | $6.5 \times 10^{-8}$      | $9.7 \times 10^{-9}$      |
|                        | X   | <b><i>PORCN</i></b>   | 11            | 32            | $5.6 \times 10^{-4}$      | $3.7 \times 10^{-7}$      |
| REVEL (>75)            | 2   | <i>DNMT3A</i>         | 98            | 121           | $2.5 \times 10^{-7}$      | $3.6 \times 10^{-7}$      |
|                        | 2   | <b><i>UGT1A8</i></b>  | 2             | 18            | $1.6 \times 10^{-7}$      | $1.3 \times 10^{-7}$      |
|                        | 7   | <b><i>CBX3</i></b>    | 7             | 10            | $2.4 \times 10^{-5}$      | $4.2 \times 10^{-7}$      |
|                        | 11  | <b><i>IFITM10</i></b> | 10            | 11            | $7.0 \times 10^{-7}$      | $5.4 \times 10^{-7}$      |
|                        | 21  | <b><i>OLIG1</i></b>   | 7             | 18            | $8.5 \times 10^{-6}$      | $6.4 \times 10^{-7}$      |

**Supplementary Table 7. Lead variant association per gene among significant genes in the burden and SKAT-O tests.** Only significant variant associations with at least 3 minor allele counts per gene are reported in this table. A significance threshold of  $p=8.3 \times 10^{-5}$  was applied after a Bonferroni correction for multiple testing. The "Reported" column indicates published studies that associated the highlighted variants with specific diseases, curated from ClinVar (<https://www.ncbi.nlm.nih.gov/clinvar/>).

| Variant Class | Chr | Gene          | Variant      | MA | MAC | REVEL | HR   | <i>p</i> -value      | Reported                                                              |
|---------------|-----|---------------|--------------|----|-----|-------|------|----------------------|-----------------------------------------------------------------------|
| REVEL (>75)   | 1   | <i>NMNAT2</i> | rs201746612  | A  | 5   | 0.782 | 11.0 | $1.7 \times 10^{-6}$ | -                                                                     |
|               | 2   | <i>DNMT3A</i> | rs751562376  | T  | 17  | 0.828 | 3.9  | $8.0 \times 10^{-4}$ | Intellectual disability /<br>Autism spectrum<br>disorder <sup>3</sup> |
|               | 5   | <i>TERT</i>   | rs1043358053 | C  | 5   | 0.790 | 16.8 | $1.7 \times 10^{-8}$ | -                                                                     |
|               | 10  | <i>PTEN</i>   | rs587782350  | C  | 3   | 0.824 | 14.7 | $7.2 \times 10^{-3}$ | Gastric Cancer <sup>4</sup>                                           |
|               | 17  | <i>TP53</i>   | rs11540652   | T  | 5   | 0.934 | 11.5 | $2.3 \times 10^{-5}$ | Breast Cancer <sup>5</sup>                                            |

Chr: chromosome; MAC: minor allele count; REVEL: REVEL score; HR: hazard ratio

**Supplementary Table 8. Mean variant allelic fraction per gene across participants included in the corresponding gene-level Burden/SKAT-O analysis.**

| Variant Class | Chr | Gene           | # of subjects | # of variants | Mean VAF (SD) |
|---------------|-----|----------------|---------------|---------------|---------------|
| LoF           | 4   | <i>TET2</i>    | 266           | 133           | 0.33 (0.14)   |
|               | 11  | <i>ATM</i>     | 734           | 128           | 0.46 (0.10)   |
|               | 13  | <i>BRCA2</i>   | 1,061         | 162           | 0.44 (0.12)   |
|               | 15  | <i>CKMT1B</i>  | 29            | 8             | 0.56 (0.17)   |
|               | 17  | <i>BRCA1</i>   | 302           | 74            | 0.46 (0.09)   |
|               | 20  | <i>ASXL1</i>   | 502           | 30            | 0.32 (0.11)   |
| AlphaMissense | 1   | <i>C1orf52</i> | 87            | 11            | 0.50 (0.07)   |
|               | 2   | <i>DNMT3A</i>  | 593           | 33            | 0.24 (0.10)   |
|               | 2   | <i>SF3B1</i>   | 23            | 5             | 0.31 (0.16)   |
|               | 4   | <i>TET2</i>    | 123           | 41            | 0.36 (0.15)   |
|               | 10  | <i>PTEN</i>    | 5             | 3             | 0.39 (0.04)   |
|               | 13  | <i>SOX21</i>   | 22            | 6             | 0.49 (0.06)   |
|               | 15  | <i>IDH2</i>    | 46            | 14            | 0.45 (0.11)   |
|               | 17  | <i>TP53</i>    | 19            | 7             | 0.28 (0.14)   |
|               | 17  | <i>SRSF2</i>   | 164           | 6             | 0.30 (0.11)   |
|               | X   | <i>RLIM</i>    | 4             | 2             | 0.44 (0.41)   |

**Supplementary Table 9. Previously reported SNP associations with lifespan from prior studies (excluding the *APOE* region).** This table summarizes SNPs previously associated with lifespan-related phenotypes in published studies that were GWAS significant in their respective studies. Notably, none of the SNPs in this table reached the suggestive threshold ( $p=1.0 \times 10^{-5}$ ) in our analysis.

| Reported phenotype    | Study                              | Chr | Gene                             | Variant     | <i>p</i> -value      |
|-----------------------|------------------------------------|-----|----------------------------------|-------------|----------------------|
| Parents' attained age | Joshi et al. (2017) <sup>6</sup>   | 6   | <i>LPA</i>                       | rs55730499  | 0.04                 |
|                       |                                    | 6   | <i>HLA-DQA1</i>                  | rs34831921  | $9.2 \times 10^{-4}$ |
|                       |                                    | 15  | <i>CHRNA3</i>                    | rs8042849   | $1.5 \times 10^{-3}$ |
|                       | Pilling et al. (2017) <sup>7</sup> | 1   | <i>CLESR2 / PSRC1 / HLA-DRB1</i> | rs602633    | 0.20                 |
|                       |                                    | 6   | <i>HLA-DQA1</i>                  | rs28383322  | 0.09                 |
|                       |                                    | 6   | <i>LPA</i>                       | rs55730499  | 0.04                 |
|                       |                                    | 8   | <i>EPHX2</i>                     | rs7844965   | 0.22                 |
|                       |                                    | 9   | <i>CDKN2B-AS1 (ANRIL)</i>        | rs1556516   | 0.02                 |
|                       |                                    | 12  | <i>SH2B3 / ATXN2</i>             | rs7137828   | 0.55                 |
|                       |                                    | 14  | <i>PROX2</i>                     | rs61978928  | 0.15                 |
|                       |                                    | 15  | <i>FURIN</i>                     | rs17514846  | 0.23                 |
|                       |                                    | 15  | <i>CHRNA3</i>                    | rs1317286   | $1.9 \times 10^{-3}$ |
|                       | Timmers et al. (2019) <sup>2</sup> | 1   | <i>MAGI3</i>                     | rs1230666   | 0.03                 |
|                       |                                    | 2   | <i>KCNK3</i>                     | rs1275922   | 0.42                 |
|                       |                                    | 4   | <i>HTT</i>                       | rs61348208  | 0.02                 |
|                       |                                    | 6   | <i>HLA-DQA1</i>                  | rs34967069  | $1.7 \times 10^{-3}$ |
|                       |                                    | 6   | <i>LPA</i>                       | rs10455872  | 0.03                 |
|                       |                                    | 9   | <i>CDKN2B-AS1</i>                | rs1556516   | 0.15                 |
|                       |                                    | 12  | <i>ATXN2/BRAP</i>                | rs11065979  | 0.88                 |
|                       |                                    | 15  | <i>CHRNA3/5</i>                  | rs8042849   | $1.5 \times 10^{-4}$ |
|                       |                                    | 15  | <i>FURIN/FES</i>                 | rs6224      | 0.35                 |
|                       |                                    | 16  | <i>HP</i>                        | rs12924886  | 0.87                 |
|                       |                                    | 19  | <i>LDLR</i>                      | rs142158911 | 0.20                 |

## References

1. Liu JZ, *et al.* The burden of rare protein-truncating genetic variants on human lifespan. *Nature Aging* **2**, 289-294 (2022).
2. Timmers PR, *et al.* Genomics of 1 million parent lifespans implicates novel pathways and common diseases and distinguishes survival chances. *elife* **8**, e39856 (2019).
3. Yokoi T, Enomoto Y, Naruto T, Kurosawa K, Higurashi N. Tatton-Brown-Rahman syndrome with a novel DNMT3A mutation presented severe intellectual disability and autism spectrum disorder. *Hum Genome Var* **7**, 15 (2020).
4. Usui Y, *et al.* Helicobacter pylori, Homologous-Recombination Genes, and Gastric Cancer. *N Engl J Med* **388**, 1181-1190 (2023).
5. Jordan JJ, *et al.* Altered-function p53 missense mutations identified in breast cancers can have subtle effects on transactivation. *Mol Cancer Res* **8**, 701-716 (2010).
6. Joshi PK, *et al.* Genome-wide meta-analysis associates HLA-DQA1/DRB1 and LPA and lifestyle factors with human longevity. *Nature Communications* **8**, 910 (2017).
7. Pilling LC, *et al.* Human longevity: 25 genetic loci associated in 389,166 UK biobank participants. *Aging (Albany NY)* **9**, 2504-2520 (2017).
